# Supplementary material
Source: PubMed Central journal article supplement (PMC7303903)

## Supplementary Online Content

Salviat F, Gauthier-Villars M, Carton M, et al. Association between genotype and phenotype in consecutive unrelated individuals with retinoblastoma. *JAMA Ophthalmol*. Published online June 18, 2020. doi:10.1001/jamaophthalmol.2020.2100

**eTable.** International Intraocular Retinoblastoma Classification

**eFigure 1.** *RB1* Germline Pathogenic Variants and *RB1* Somatic Pathogenic Variants

**eFigure 2.** Age in Months at Diagnosis of Retinoblastoma According to Laterality, at Diagnosis of Retinoblastoma Among Unilateral Cases, and at Diagnosis of Retinoblastoma Among Bilateral Cases

**eFigure 3.** Age in Months at Diagnosis of Retinoblastoma According to *RB1* Germline Carriage, Among Noncarriers of *RB1* Germline Pathogenic Variant, and of Retinoblastoma Among Carriers of *RB1* Germline Pathogenic Variant

This supplementary material has been provided by the authors to give readers additional information about their work.

**eTable.** International Intraocular Retinoblastoma Classification, according to Murphree<sup>30</sup>

| Group | Risk of treatment failure with primary chemotherapy and focal consolidation | Global clinical description                                                                                         | Details                                                                                                                                                                                                                                                                                          |
|-------|-----------------------------------------------------------------------------|---------------------------------------------------------------------------------------------------------------------|--------------------------------------------------------------------------------------------------------------------------------------------------------------------------------------------------------------------------------------------------------------------------------------------------|
| A     | Very low                                                                    | Eyes with <b>small</b> tumors away from critical structures                                                         | All tumors are 3 mm or smaller, confined to the retina, and located at least 3 mm from the foveola and 1.5 mm from the optic nerve. No vitreous or subretinal seeding is allowed.                                                                                                                |
| B     | Low                                                                         | Eyes with <b>no</b> vitreous or subretinal seeding and discrete retinal tumor of any size or location               | Retinal tumors may be of any size or location not in Group A. No vitreous or subretinal seeding allowed. A small cuff of subretinal fluid extending no more than 5 mm from the base of the tumor is allowed.                                                                                     |
| C     | Moderate                                                                    | Eyes with only <b>focal</b> vitreous or subretinal seeding and discrete retinal tumors of any size and location     | Any seeding must be local, fine, and limited so as to be theoretically treatable with a radioactive plaque. Retinal tumors are discrete and of any size and location. Up to one quadrant of subretinal fluid may be present.                                                                     |
| D     | High                                                                        | Eyes with <b>diffuse</b> vitreous or subretinal seeding and/or massive, nondiscrete endophytic or exophytic disease | Eyes with more extensive seeding than Group C. Massive and/or diffuse intraocular disseminated disease may consist of fine or "greasy" vitreous seeding or avascular masses. Subretinal seeding may be plaque-like. Includes exophytic disease and more than one quadrant of retinal detachment. |
| E     | Very high                                                                   | Eyes that have been <b>destroyed</b> anatomically or functionally by the tumor                                      | Eyes with one or more of the following : irreversible neovascular glaucoma, massive intraocular hemorrhage, aseptic orbital cellulitis, tumor anterior to anterior vitreous face, tumor touching the lens, diffuse infiltrating retinoblastoma, phthisis or pre-phthisis.                        |

**eFigure 1a.** *RBI* Germline Pathogenic Variants

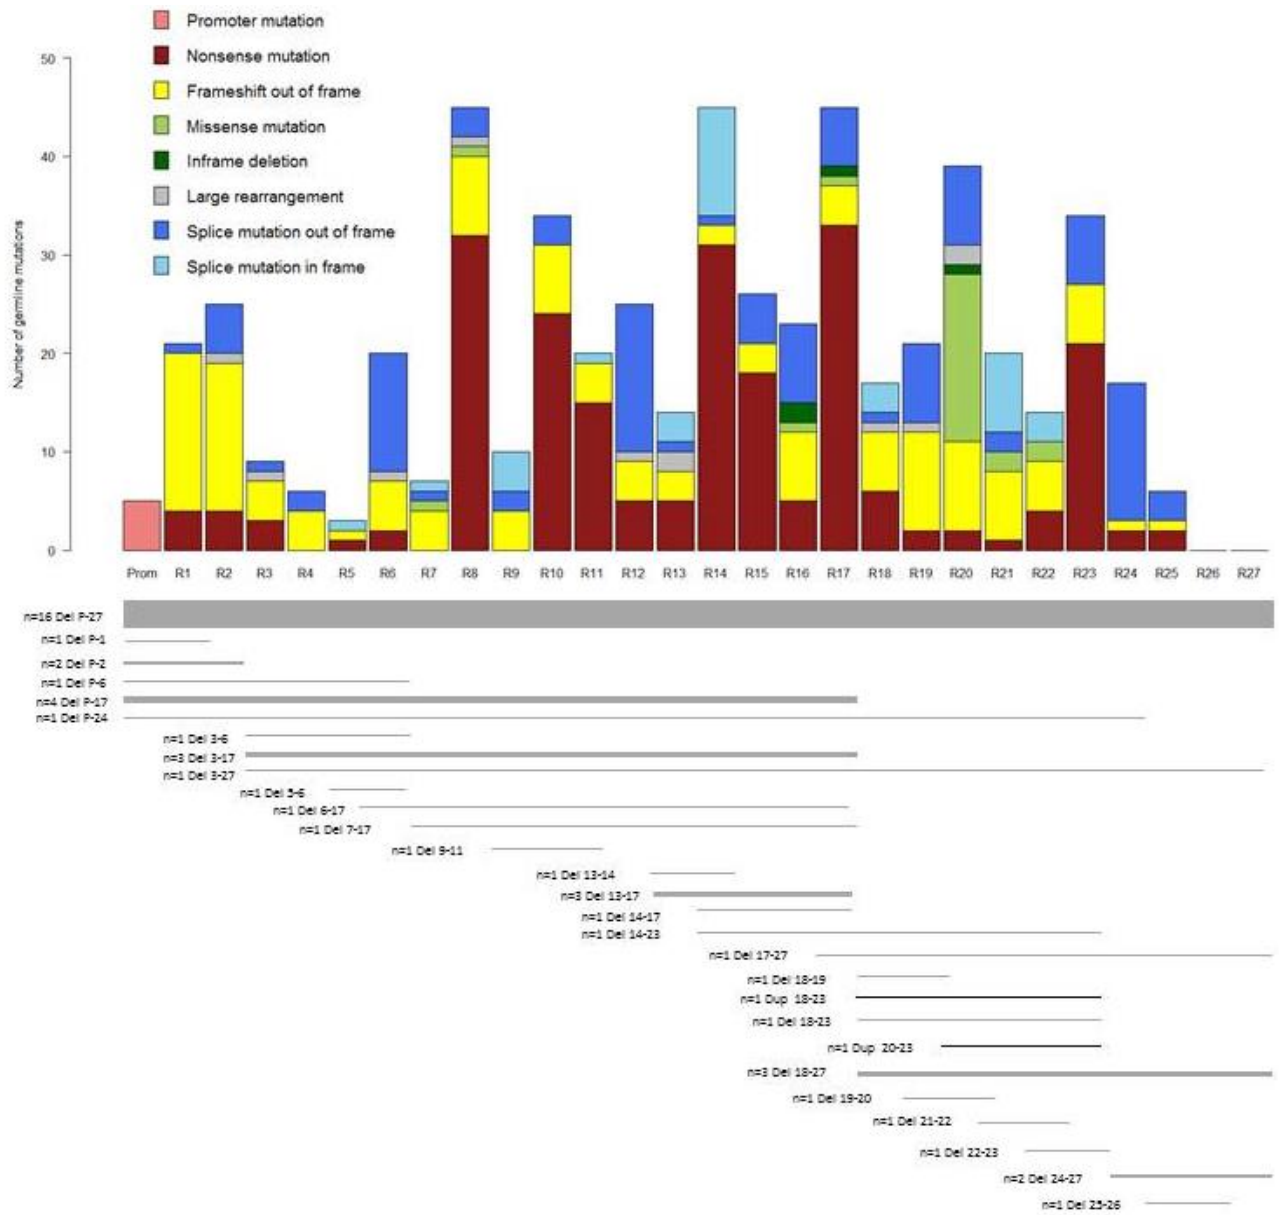

**eFigure 1b.** *RBI* Somatic Pathogenic Variants

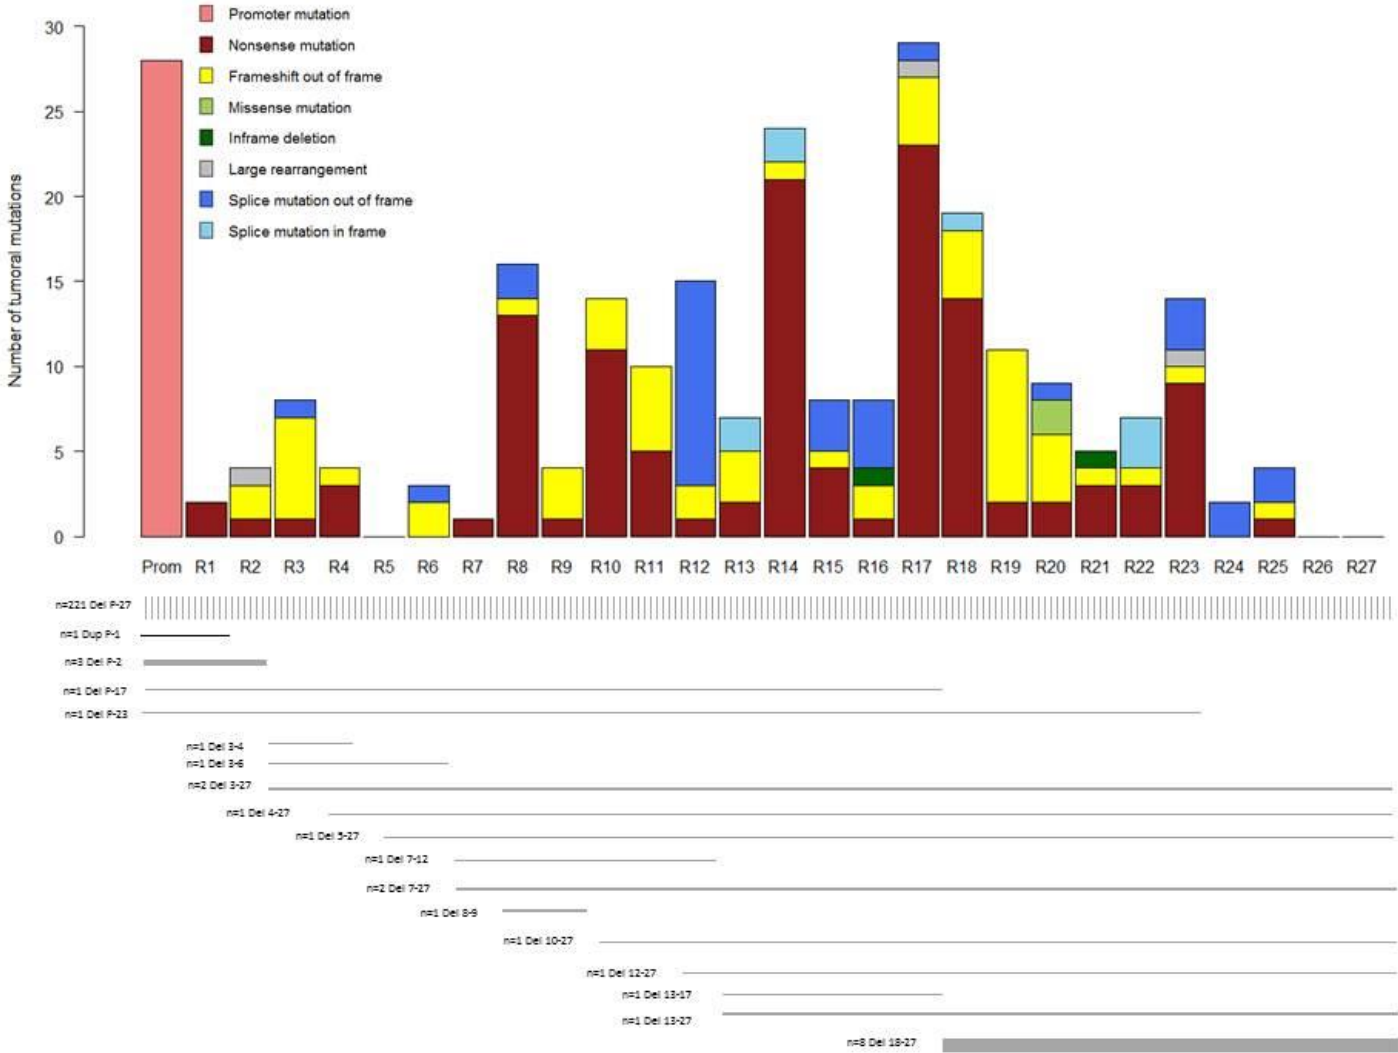

*Legend to eFigure 1:* Distribution within the *RBI* cDNA and promoter of germline point pathogenic variants and large deletions identified in 606 probands (2a). Distribution within the *RBI* cDNA and promoter of 504 somatic point pathogenic variants and large deletions identified in 293 probands (2b). The number of occurrences of large deletions is in brackets.

**eFigure 2a.** Age in Months at Diagnosis of Retinoblastoma According to Laterality

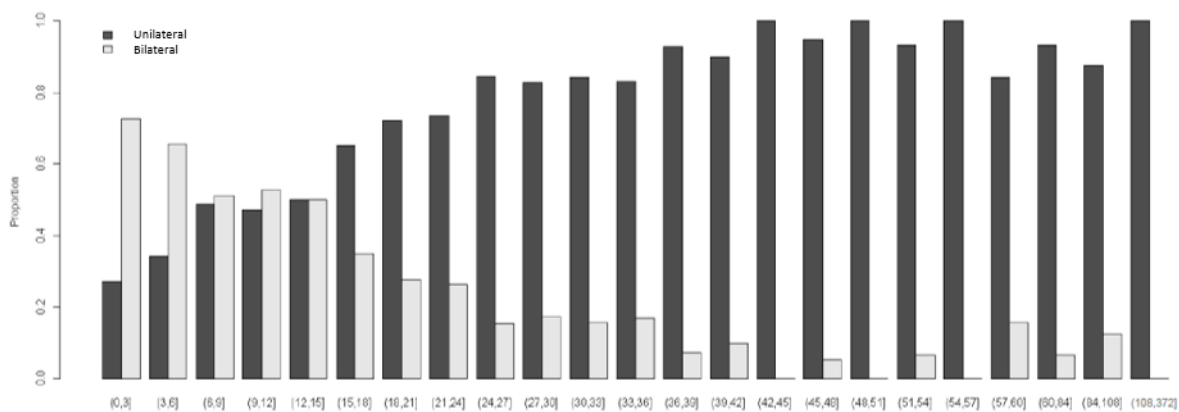

**eFigure 2b.** Age in Months at Diagnosis of Retinoblastoma Among Unilateral Cases

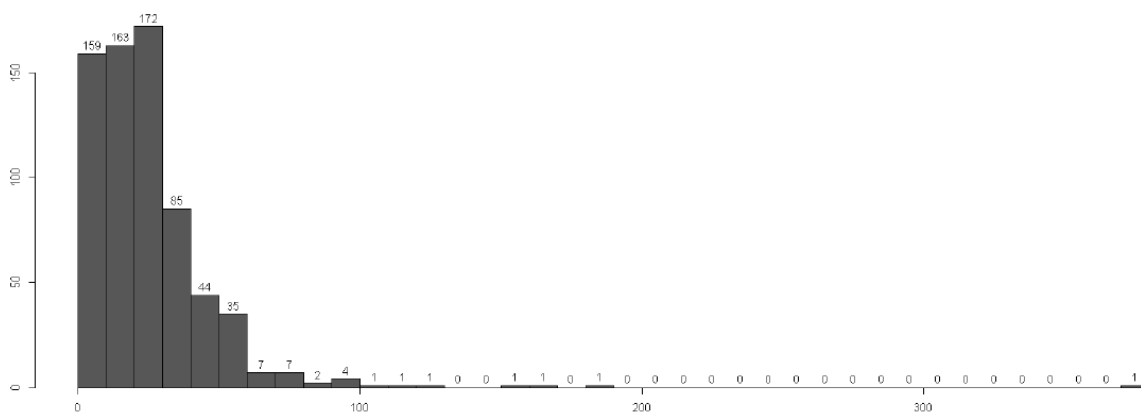

**eFigure 2c.** Age in Months at Diagnosis of Retinoblastoma Among Bilateral Cases

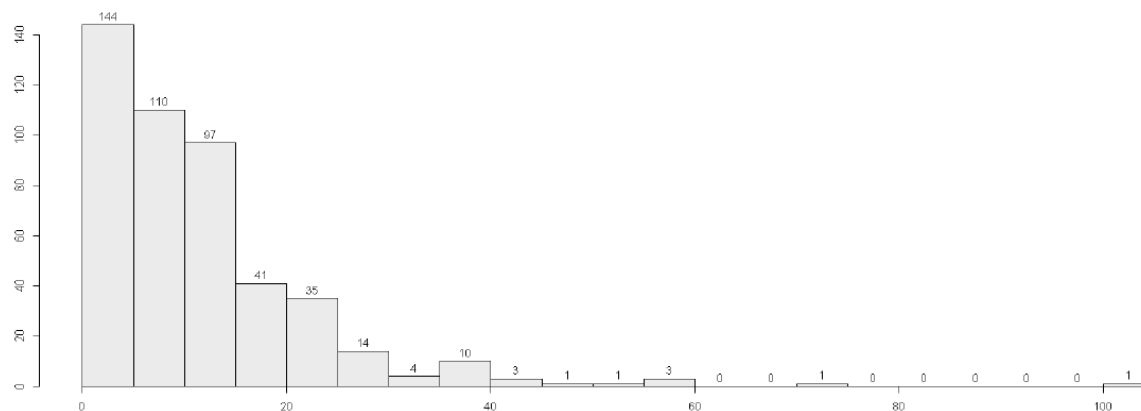

**eFigure 3a.** Age in Months at Diagnosis of Retinoblastoma According to *RBI* Germline Carriage

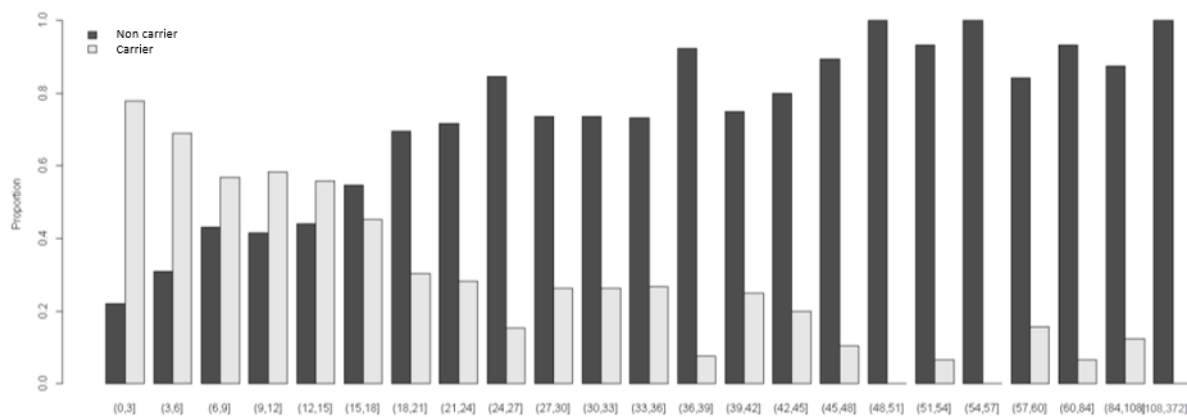

**eFigure 3b.** Age in Months at Diagnosis of Retinoblastoma Among Noncarriers of *RBI* Germline Pathogenic Variant

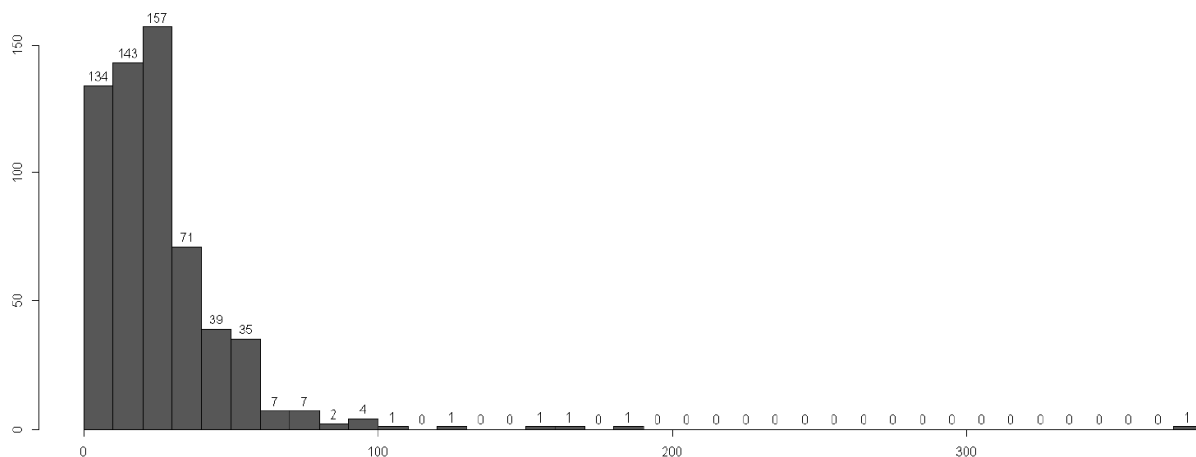

**eFigure 3c.** Age in Months at Diagnosis of Retinoblastoma Among Carriers of *RBI* Germline Pathogenic Variant

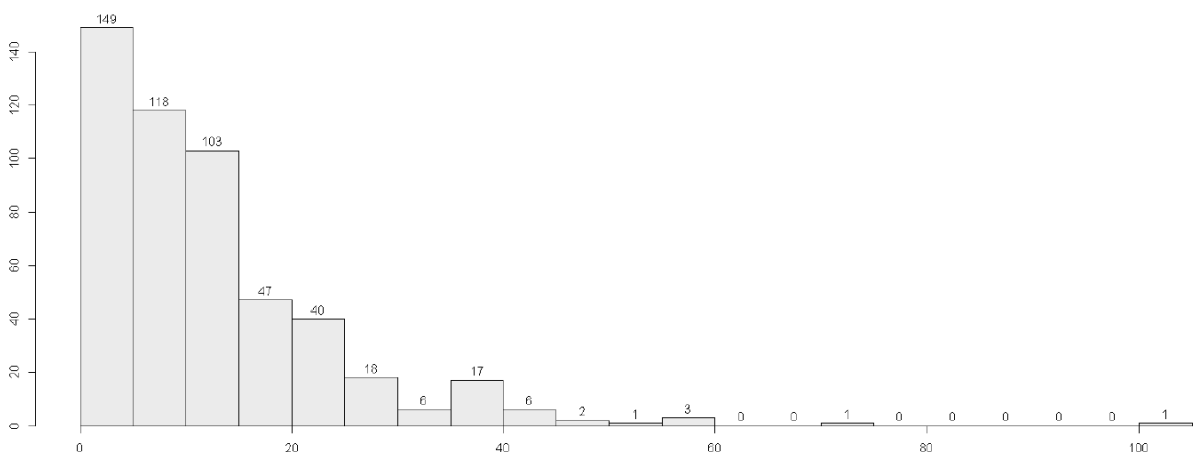

Supplement: jamaophthalmol-138-843-s001.pdf [file jamaophthalmol-138-843-s001.pdf]
